# Supplementary material for: GC content of vertebrate exome landscapes reveal areas of accelerated protein evolution
Source: PubMed Central journal article supplement (PMC6636035; doi:10.1186/s12862-019-1469-1), 2019-07-16

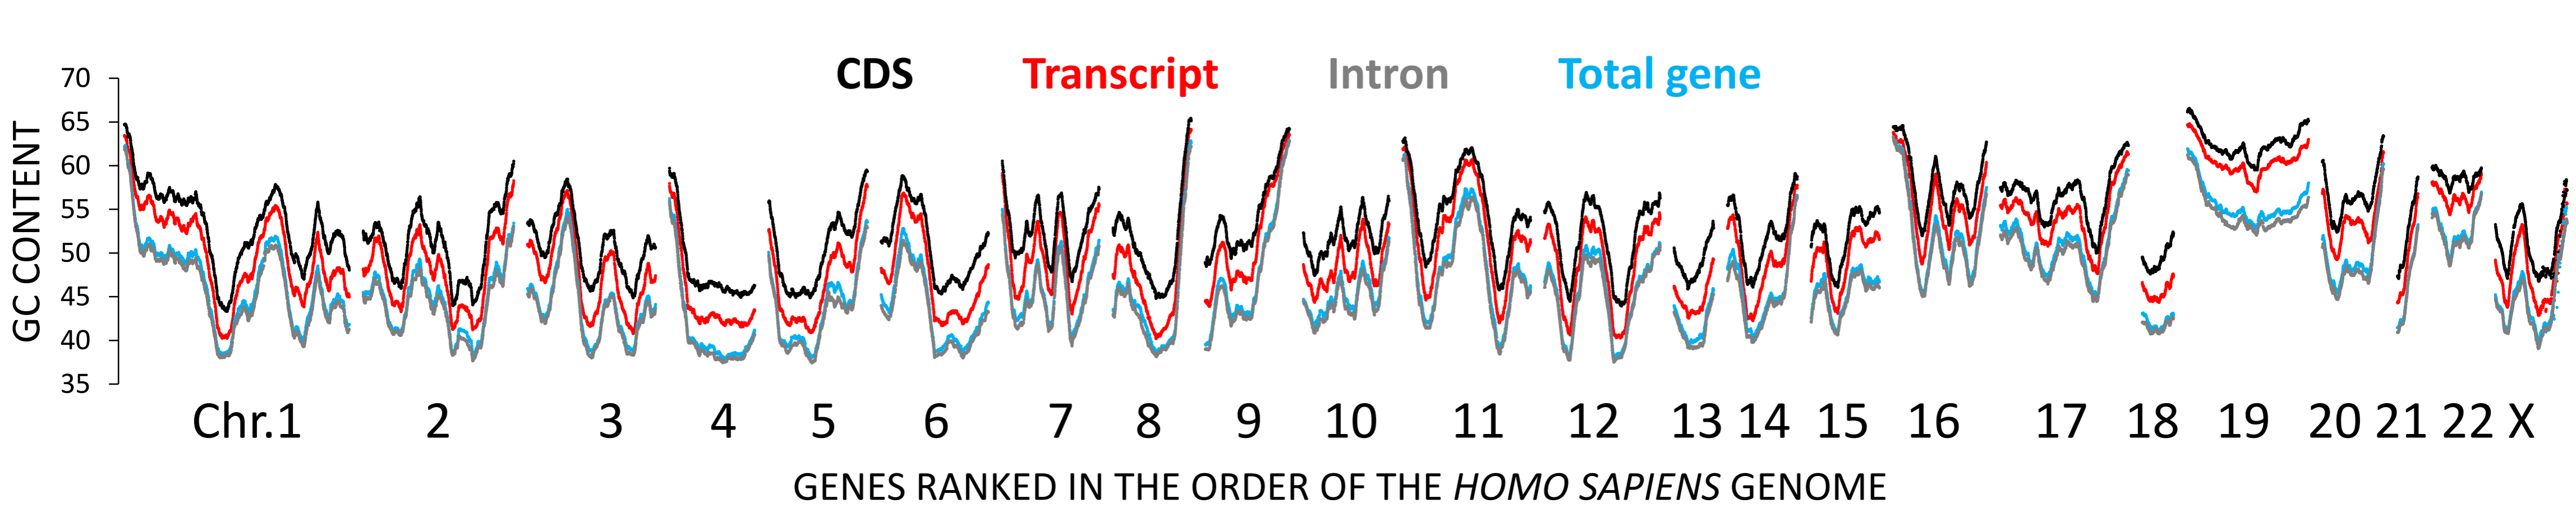

Supplement: 12862_2019_1469_MOESM3_ESM.pdf [file 12862_2019_1469_MOESM3_ESM.pdf]
